# Supplementary material for: Extracellular Vesicle Surface Signatures in IPF Patients: A Multiplex Bead-Based Flow Cytometry Approach
Source: MDPI journal article supplement (doi:10.3390/cells10051045), 2021-04-28
Supplement: s1 [file s1]

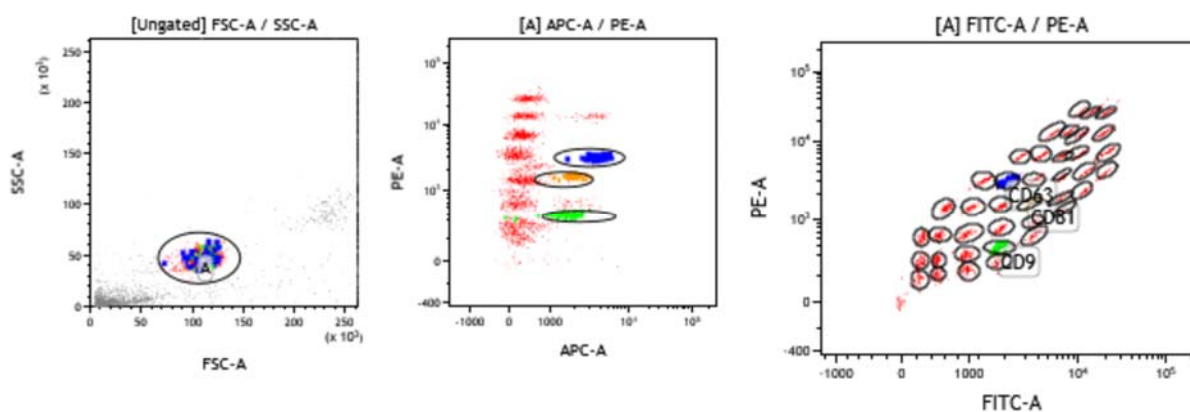

**Figure S1a.** Cytofluorimetric analysis of exosomal surface epitopes in a representative serum sample from Idiopathic Pulmonary Fibrosis patient analyzed through Kaluza Software.

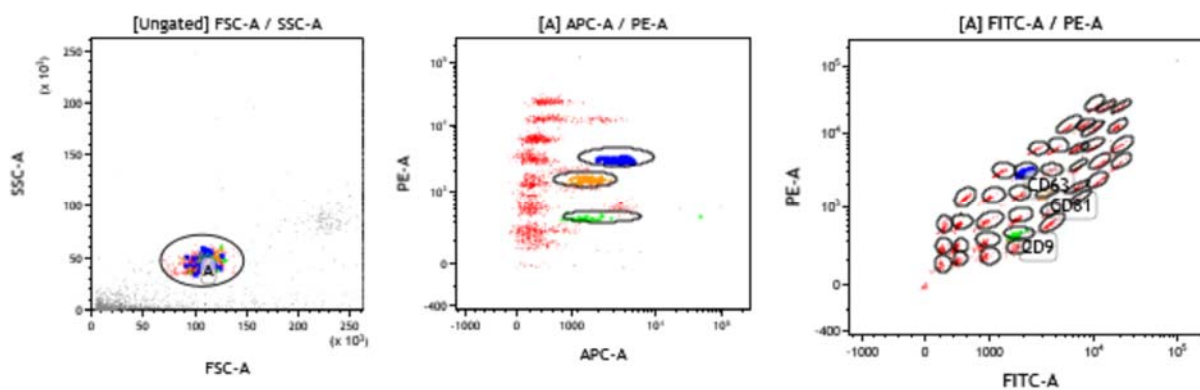

**Figure S1b.** Cytofluorimetric analysis of exosomal surface epitopes in a representative serum sample from healthy control analyzed through Kaluza Software.
